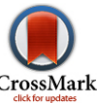

## Correction

# Correction: Multiple Resistances and Complex Mechanisms of *Anopheles sinensis* Mosquito: A Major Obstacle to Mosquito-Borne Diseases Control and Elimination in China

The *PLOS Neglected Tropical Diseases* Staff

In the Funding section, one of the grant numbers from the funder the National Institutes of Health is listed incorrectly. The correct grant number is: U19 AI089672.

## Reference

1. Chang X, Zhong D, Fang Q, Hartsel J, Zhou G, et al. (2014) Multiple Resistances and Complex Mechanisms of *Anopheles sinensis* Mosquito: A Major Obstacle to Mosquito-Borne Diseases Control and Elimination in China. PLoS Negl Trop Dis 8(5): e2889. doi:10.1371/journal.pntd.0002889

**Citation:** The *PLOS Neglected Tropical Diseases* Staff (2014) Correction: Multiple Resistances and Complex Mechanisms of *Anopheles sinensis* Mosquito: A Major Obstacle to Mosquito-Borne Diseases Control and Elimination in China. PLoS Negl Trop Dis 8(6): e2967. doi:10.1371/journal.pntd.0002967

**Published:** June 12, 2014

**Copyright:** © 2014 The *PLOS Neglected Tropical Diseases* Staff. This is an open-access article distributed under the terms of the Creative Commons Attribution License, which permits unrestricted use, distribution, and reproduction in any medium, provided the original author and source are credited.
